# Supplementary material for: Interpolating station quantile biases for tropospheric ozone MDA8 bias correction
Source: Copernicus journal article supplement (doi:10.5194/egusphere-2025-6218), 2026-02-05

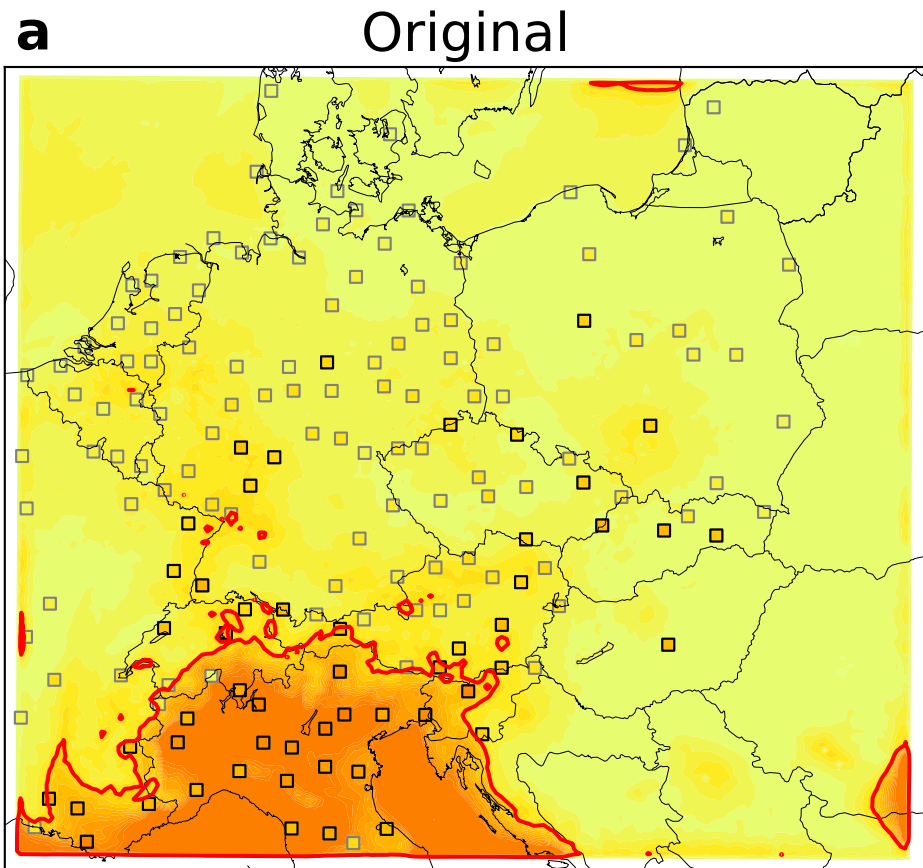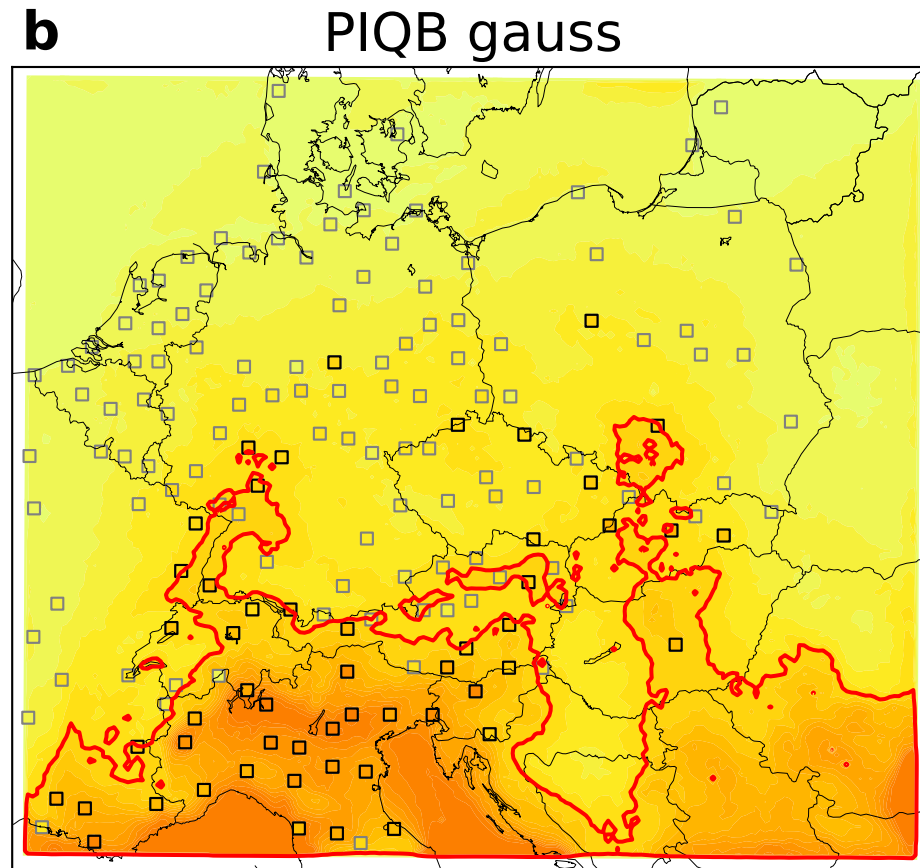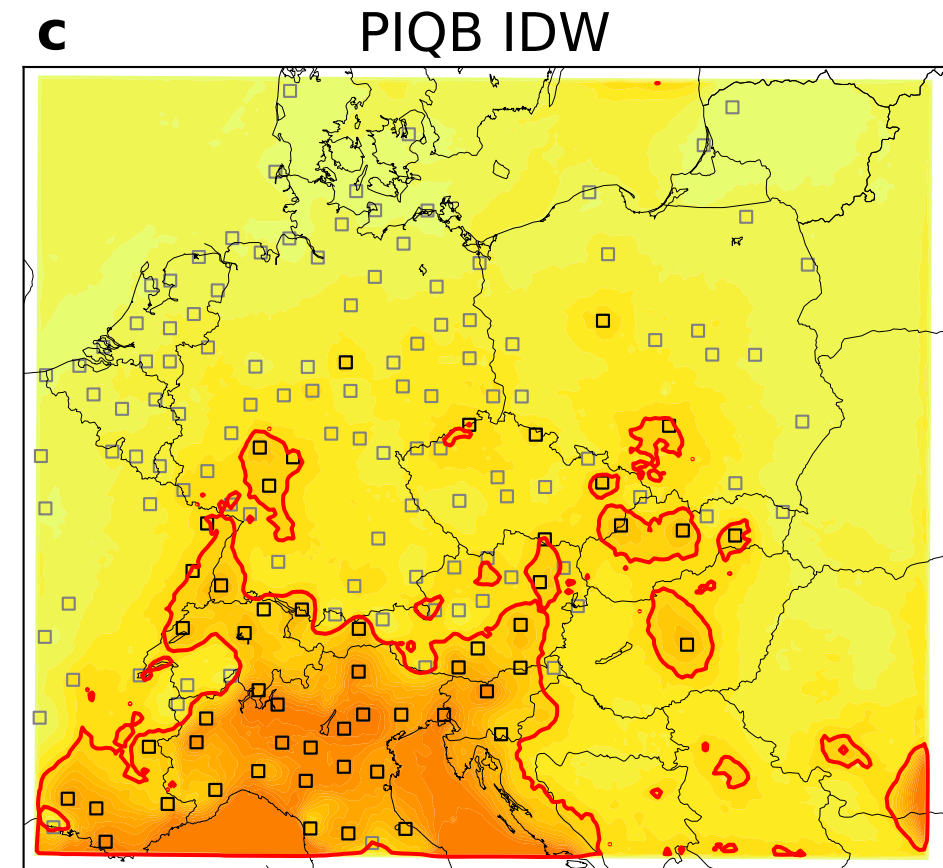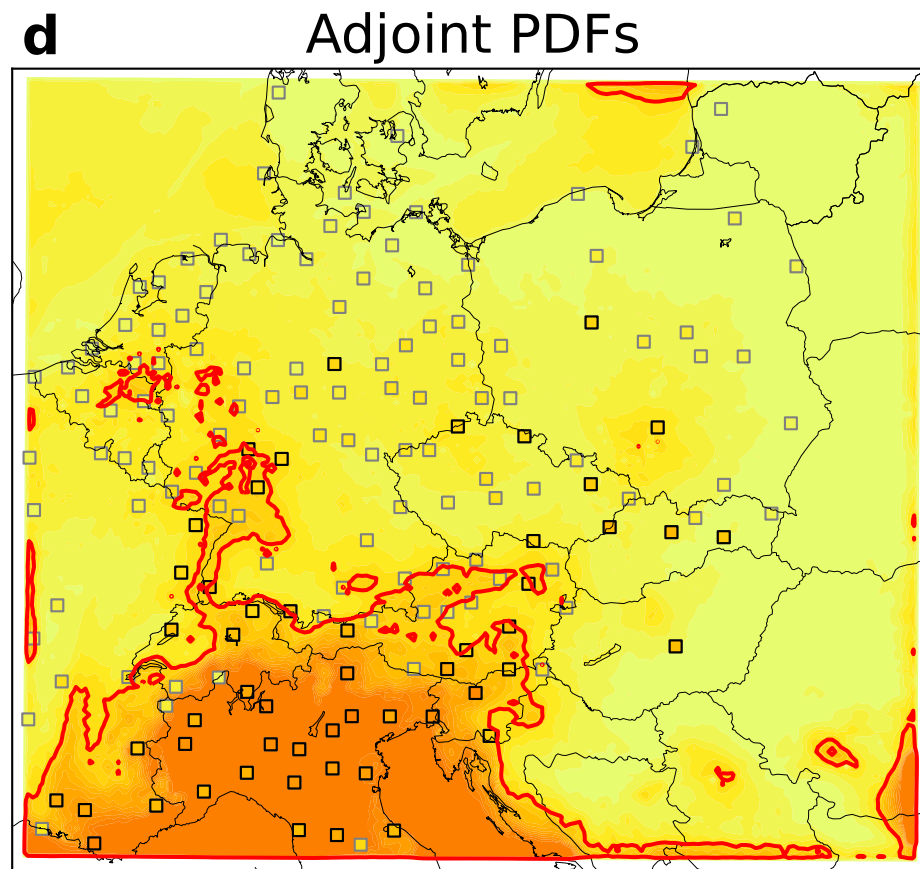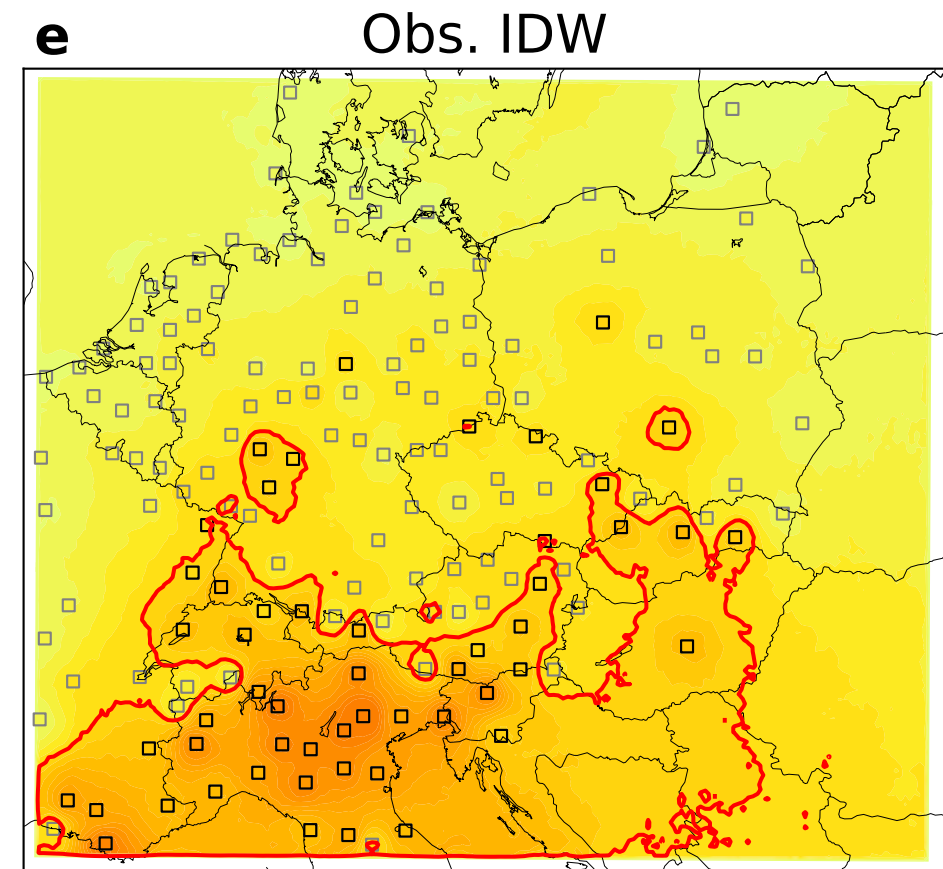

Supplement: Supplementary file [file egusphere-2025-6218-AC1-supplement.pdf]
